# Supplementary material for: Posterior parietooccipital hypometabolism may differentiate mild cognitive impairment from dementia in Parkinson’s disease
Source: Springer Nature journal article supplement (doi:10.1007/s00259-012-2198-5), 2012-08-07
Supplement: MOESM3 [file 259_2012_2198_MOESM3_ESM.doc]

|  | **Cluster size** | **Coordinates** | | | | | |  | | **Hemisphere** | **Lobe** | **Gyrus** | |
| --- | --- | --- | --- | --- | --- | --- | --- | --- | --- | --- | --- | --- | --- |
|  | **X** | | **Y** | | **Z** | | **T** | |
|  | 56859 | 50.49 | | -49.41 | | 31.49 | | *7.22* | | Right | Parietal | Supramarginal Gyrus | |
|  |  | 11.88 | | -90.48 | | -3.04 | | *7.18* | | Right | Occipital | Lingual Gyrus | |
|  |  | 34.16 | | -66.37 | | 42.01 | | *7.05* | | Right | Parietal | Precuneus | |
|  |  | -44.55 | | -62.63 | | 29.39 | | *6.06* | | Left | Temporal | Middle Temporal Gyrus | |
|  |  | -40.10 | | -60.49 | | 43.10 | | *5.87* | | Left | Parietal | Inferior Parietal Lobule | |
|  |  | 28.22 | | -83.94 | | 11.11 | | *5.8* | | Right | Occipital | Middle Occipital Gyrus | |
|  |  | -7.43 | | -90.41 | | -1.78 | | *5.77* | | Left | Occipital | Lingual Gyrus | |
|  |  | 56.43 | | -44.23 | | -10.40 | | *5.72* | | Right | Temporal | Middle Temporal Gyrus | |
|  |  | -29.70 | | -70.73 | | 42.23 | | *5.66* | | Left | Parietal | Precuneus | |
|  |  | 63.86 | | -35.19 | | -4.55 | | *5.49* | | Right | Temporal | Middle Temporal Gyrus | |
|  |  | -32.67 | | -85.04 | | -10.88 | | *5.44* | | Left | Occipital | Inferior Occipital Gyrus | |
| PDD |  | -29.70 | | -85.80 | | 3.03 | | *5.07* | | Left | Occipital | Middle Occipital Gyrus | |
| vs. |  | -7.43 | | -62.84 | | 54.27 | | *4.66* | | Left | Parietal | Superior Parietal Lobule | |
| Controls |  | -7.43 | | -86.64 | | 15.39 | | *4.19* | | Left | Occipital | Cuneus | |
|  |  | 8.91 | | -70.59 | | 15.97 | | *4* | | Right | Occipital | Cuneus | |
|  |  | -53.46 | | -37.72 | | 32.29 | | *3.85* | | Left | Parietal | Supramarginal Gyrus | |
|  |  | 57.92 | | -12.76 | | -22.07 | | *3.83* | | Right | Temporal | Inferior Temporal Gyrus | |
|  | 8158 | 38.61 | | 21.31 | | 47.29 | | *5.19* | | Right | Frontal | Middle Frontal Gyrus | |
|  |  | 32.67 | | 20.54 | | -26.26 | | *4.58* | | Right | Temporal | Superior Temporal Gyrus | |
|  |  | 41.58 | | 24.26 | | -10.05 | | *3.38* | | Right | Frontal | Inferior Frontal Gyrus | |
|  | 2658 | -43.07 | | 23.59 | | 34.74 | | *5* | | Left | Frontal | Precentral Gyrus | |
|  |  | -46.04 | | 30.24 | | 21.98 | | *4.65* | | Left | Frontal | Middle Frontal Gyrus | |
|  | 3108 | -35.64 | | 16.18 | | -26.04 | | *4.49* | | Left | Temporal | Superior Temporal Gyrus | |
|  |  | -41.58 | | 25.65 | | -11.38 | | *3.95* | | Left | Frontal | Inferior Frontal Gyrus | |
|  | 978 | -13.37 | | 6.43 | | 12.11 | | *4.33* | | Left | Sub-lobar | Caudate | |
|  | 1113 | 14.85 | | 10.72 | | 10.52 | | *4.31* | | Right | Sub-lobar | Caudate | |
|  |  | 5.94 | | -15.16 | | 17.34 | | *3.73* | | Right | Sub-lobar | Thalamus | |
|  | 1508 | 11.88 | | -20.35 | | 30.03 | | *4.25* | | Right | Limbic | Cingulate Gyrus | |
|  | 996 | -11.88 | | 60.62 | | 17.69 | | *3.78* | | Left | Frontal | Superior Frontal Gyrus | |
|  |  | -7.43 | | 52.94 | | 9.79 | | *3.61* | | Left | Frontal | Medial Frontal Gyrus | |
|  | 38 | -1.49 | | -16.68 | | 16.03 | | *3.38* | | Left | Sub-lobar | Thalamus | |
|  | 4929 | 11.88 | | -88.58 | | 5.81 | | *5.22* | | Right | Occipital | Lingual Gyrus | |
|  |  | 7.43 | | -72.11 | | 14.66 | | *3.51* | | Right | Occipital | Cuneus | |
|  |  | 28.22 | | -85.53 | | 8.43 | | *3.31* | | Right | Occipital | Middle Occipital Gyrus | |
|  | 4126 | 49.01 | | -50.94 | | 30.18 | | *4.73* | | Right | Parietal | Supramarginal Gyrus | |
|  |  | 32.67 | | -64.92 | | 41.94 | | *4.39* | | Right | Parietal | Precuneus | |
|  | 232 | -25.25 | | 21.80 | | -30.11 | | *4.15* | | Left | Temporal | Superior Temporal Gyrus | |
|  | 2630 | -40.10 | | -54.54 | | 45.56 | | *4.06* | | Left | Parietal | Inferior Parietal Lobule | |
| PDMCI |  | -40.10 | | -66.78 | | 33.74 | | *3.66* | | Left | Parietal | Precuneus | |
| vs. | 829 | 35.64 | | 43.28 | | -8.47 | | *3.94* | | Right | Frontal | Middle Frontal Gyrus | |
| Controls |  | 44.55 | | 21.42 | | -8.64 | | *3.73* | | Right | Frontal | Inferior Frontal Gyrus | |
|  | 179 | -62.37 | | -55.28 | | 1.50 | | *3.85* | | Left | Temporal | Middle Temporal Gyrus | |
|  | 695 | 57.92 | | -31.27 | | -13.57 | | *3.75* | | Right | Temporal | Inferior Temporal Gyrus | |
|  |  | 59.40 | | -49.60 | | -1.30 | | *3.45* | | Right | Temporal | Middle Temporal Gyrus | |
|  | 973 | -37.13 | | 40.44 | | -7.07 | | *3.75* | | Left | Frontal | Middle Frontal Gyrus | |
|  |  | -38.61 | | 49.62 | | 1.66 | | *3.33* | | Left | Frontal | Inferior Frontal Gyrus | |
|  | 73 | 8.91 | | 58.95 | | -15.57 | | *3.47* | | Right | Frontal | Medial Frontal Gyrus | |
|  | 124 | 35.64 | | 22.14 | | 34.82 | | *3.43* | | Right | Frontal | Precentral Gyrus | |
|  | 114 | -7.43 | | 42.28 | | 29.66 | | *3.40* | | Left | Frontal | Medial Frontal Gyrus | |
|  | 109 | -54.95 | | -31.34 | | -14.83 | | *3.04* | | Left | Temporal | Inferior Temporal Gyrus | |
|  | 20 | 4.46 | | -18.41 | | 10.59 | | *3.24* | | Right | Sub-lobar | Thalamus | |
|  | 29 | -13.37 | | 9.06 | | 6.46 | | *3.23* | | Left | Sub-lobar | Caudate | |
|  |  | |  | |  |  |  | |  | |  |  |  |
|  |  | |  | |  |  |  | |  | |  |  |  |

**Supplementary table 3:** Summary of areas of hypometabolism in patient with PD and mild cognitive impairment (PD-MCI) and with dementia (PDD) in comparison with control subjects.
